# Supplementary material
Source: PubMed Central journal article supplement (PMC10746168)
Supplement: NIHMS1918052-supplement-Supinfo.pdf [file NIHMS1918052-supplement-Supinfo.pdf]

# ADVANCED FUNCTIONAL MATERIALS

## Supporting Information

for *Adv. Funct. Mater.*, DOI 10.1002/adfm.202305506

In Vitro Prostate Cancer Treatment via CRISPR-Cas9 Gene Editing Facilitated by Polyethyleneimine-Derived Graphene Quantum Dots

*Bong Lee, Klara Gries, Alina R. Valimukhametova, Ryan L. McKinney, Roberto Gonzalez-Rodriguez, Ugur C. Topkiran, Jeffery Coffey, Giridhar R. Akkaraju and Anton V. Naumov\**

## ***In Vitro* Prostate Cancer Treatment via CRISPR-Cas9 Gene Editing Facilitated by Polyethyleneimine-Derived Graphene Quantum Dots**

Bong Lee<sup>1</sup>, Klara Gries<sup>2</sup>, Alina R. Valimukhametova<sup>1</sup>, Ryan L. McKinney<sup>1</sup>, Roberto Gonzalez-Rodriguez<sup>3</sup>, Ugur C. Topkiran<sup>1</sup>, Jeffery Coffey<sup>4</sup>, Giridhar R. Akkaraju<sup>5</sup>, Anton V. Naumov<sup>1\*</sup>

<sup>1</sup>Department of Physics and Astronomy, Texas Christian University, Fort Worth, TX

<sup>2</sup>Department of Chemistry and Biochemistry, Heidelberg University, Heidelberg, Germany

<sup>3</sup>Department of Physics, University of North Texas, Denton, TX

<sup>4</sup>Department of Chemistry and Biochemistry, Texas Christian University, Fort Worth, TX

<sup>5</sup>Department of Biology, Texas Christian University, Fort Worth, TX

\*Correspondence: a.naumov@tcu.edu; Tel.: +1 (713) 253-8775

### **Supporting Information**

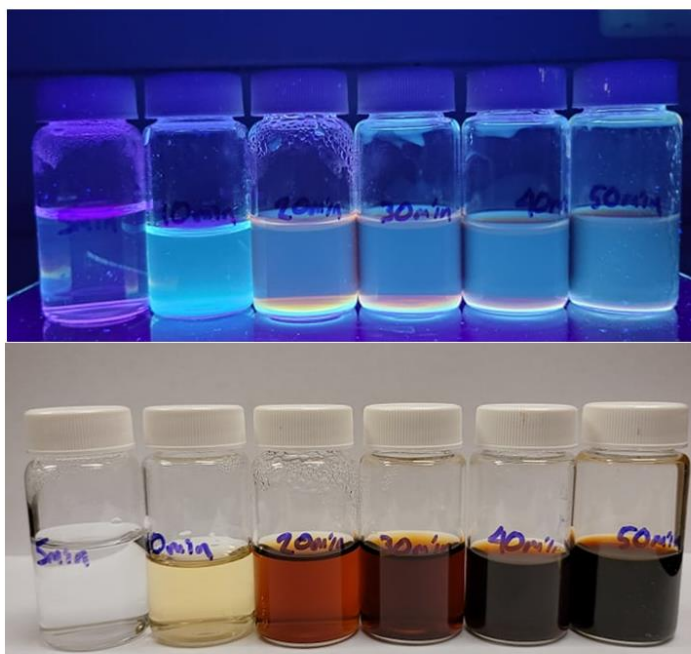

**Figure S1.** Fluorescence upon UV illumination (top) and suspension colors (bottom) for different batches of PEI-GQD after the synthetic times of 5, 10, 20, 30, 40, and 50 min in a microwave-assisted hydrothermal reaction.

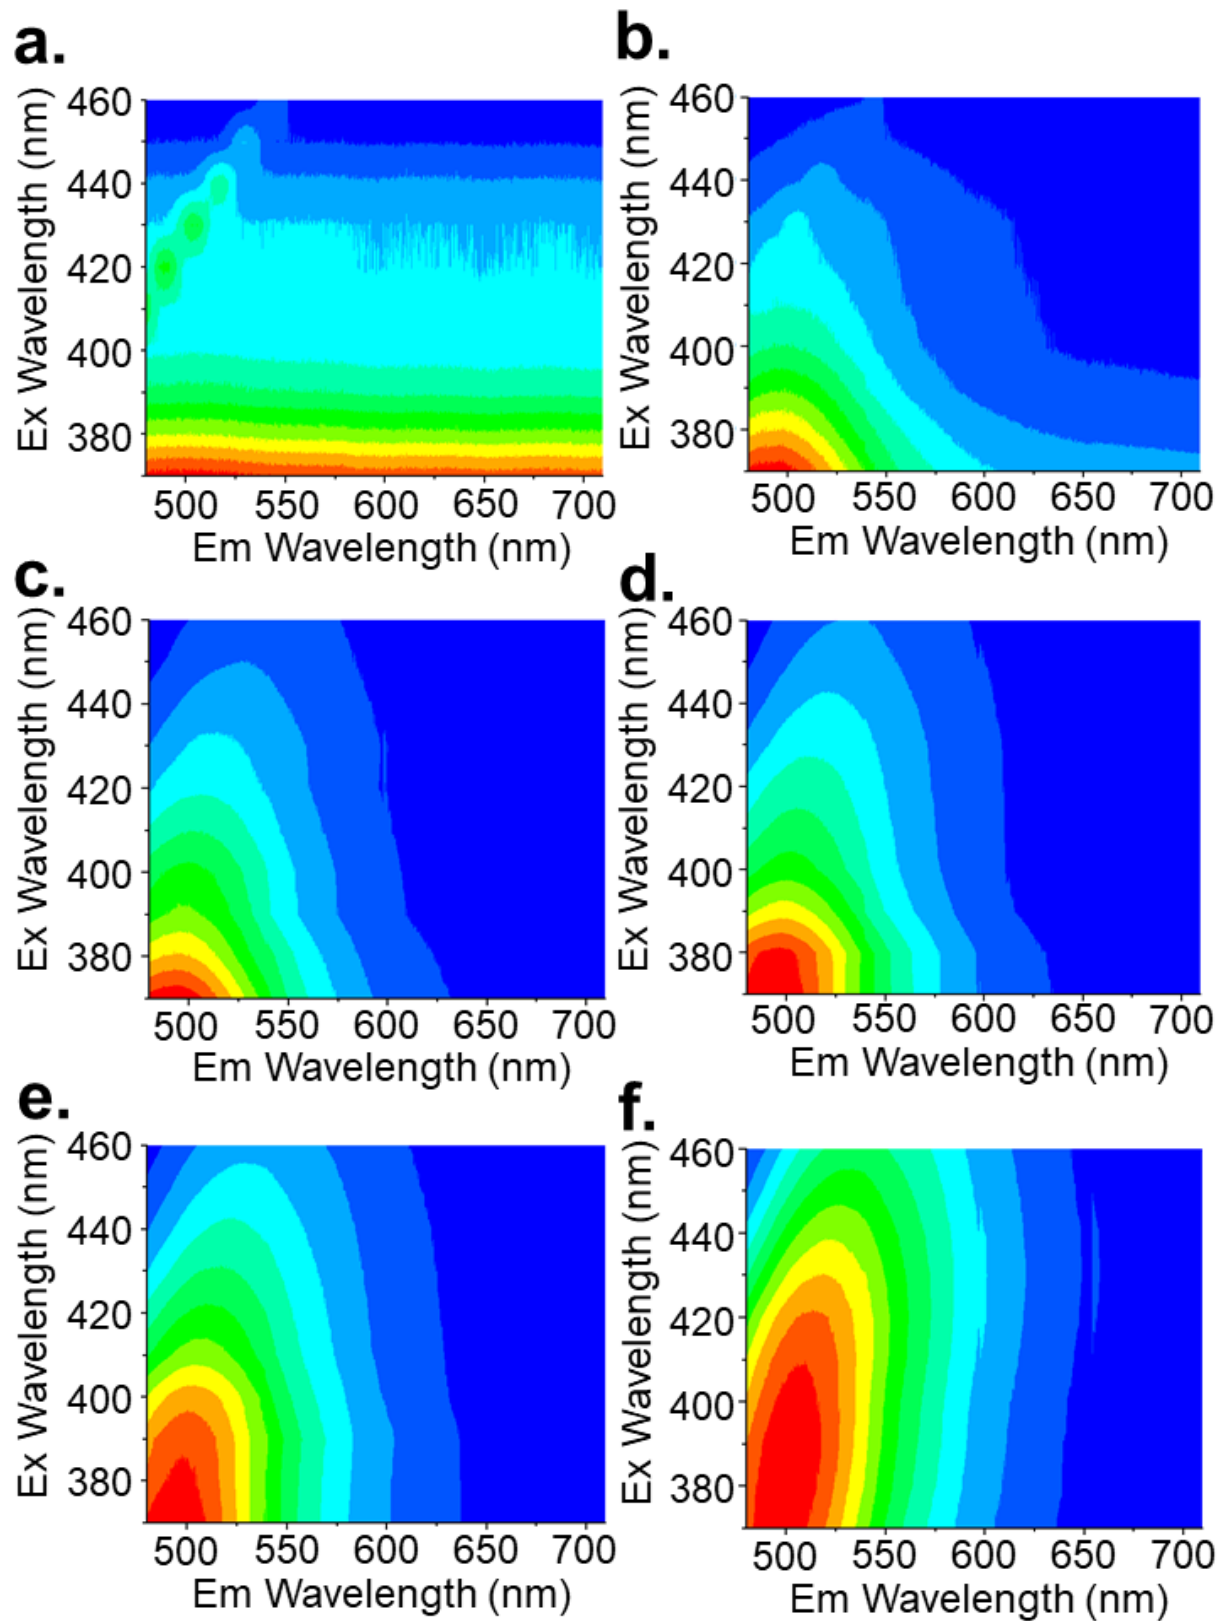

**Figure S2.** Excitation-emission maps of PEI-GQDs synthesized at different reaction times of (a) 5 min, (b) 10 min, (c) 20 min, (d) 30 min, (e) 40 min, and (f) 50 min.

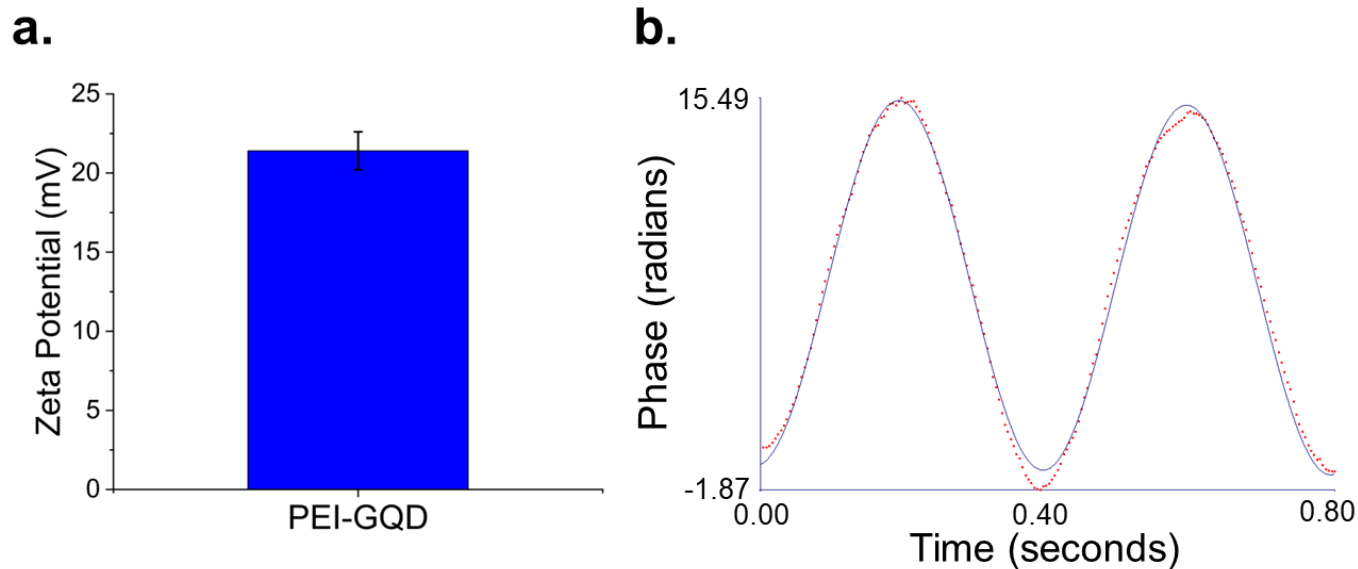

**Figure S3.** (a) Zeta potential of PEI-GQD ( $21.4 \pm 1.2$  mV) (mean  $\pm$  SE,  $n = 10$ ) and (b) Zeta potential phase analysis of PEI-GQDs.

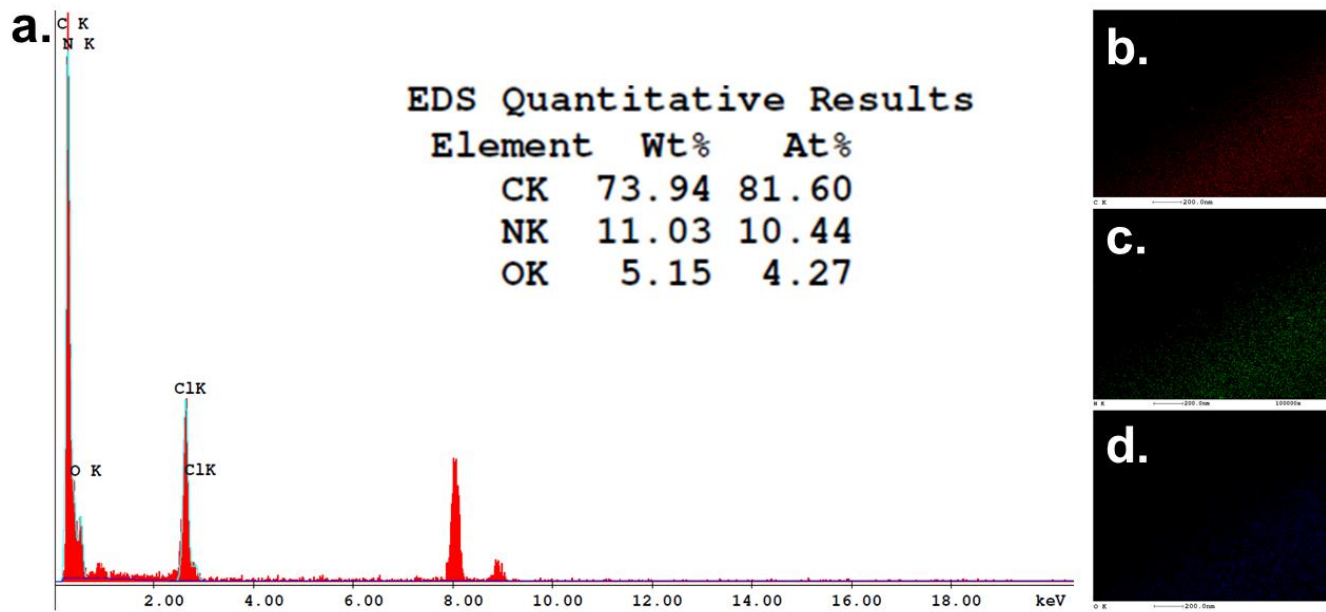

**Figure S4.** (a) EDS spectrum of PEI-GQDs. Inset: Atomic weight percentage of carbon, nitrogen, and oxygen. Elemental maps of PEI-GQDs for (b) carbon, (c) nitrogen, and (d) oxygen in the region containing PEI-GQDs.

**Figure S5.**

Gel  
retardation

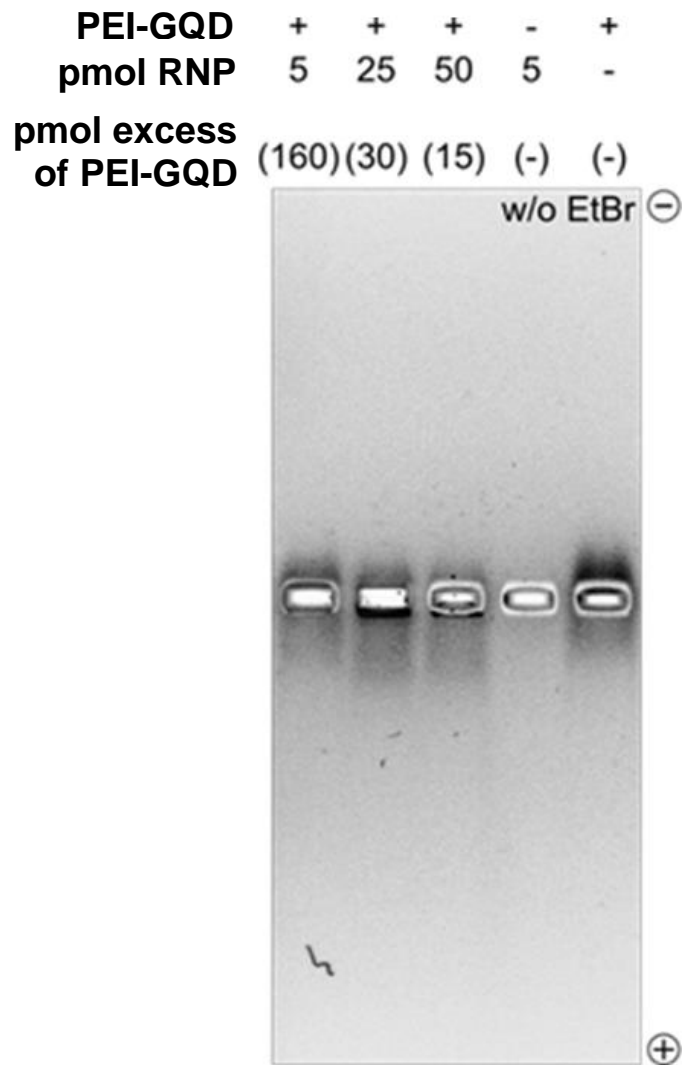

assay testing the complexation of positively charged PEI-GQDs with negatively charged RNP. From left to right, the molar excess of PEI-GQDs to RNP is 160, 30, and 15, along with only RNP and PEI-GQDs in the last gel lanes. The gel has not been stained with ethidium bromide.

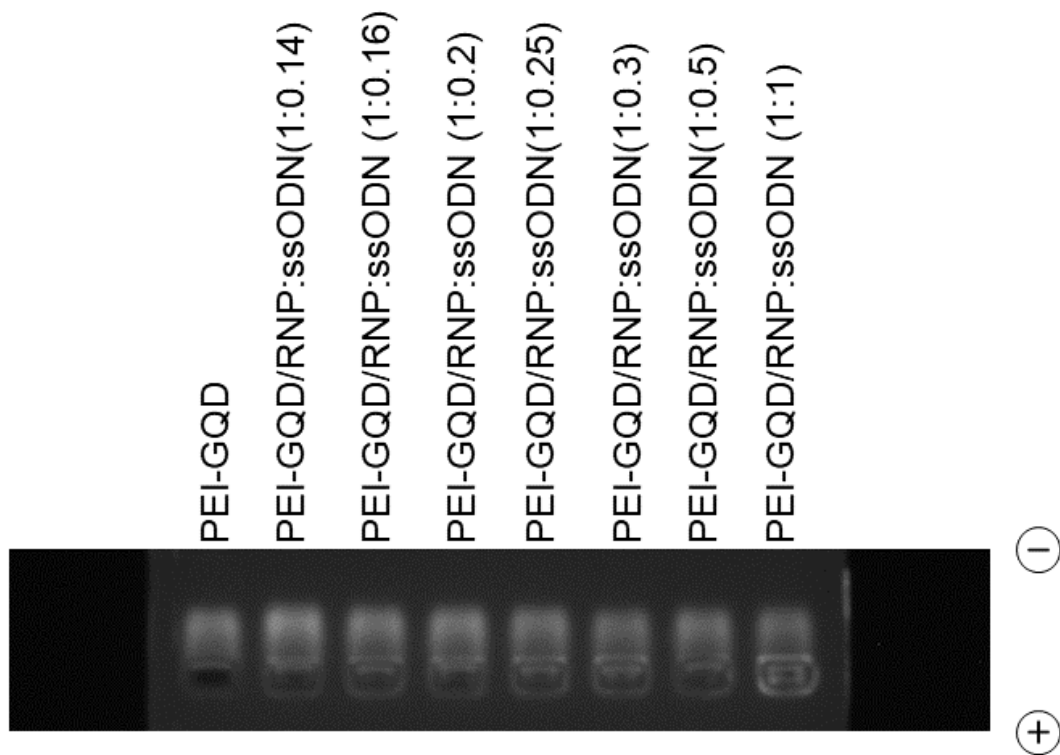

**Figure S6.** Gel retardation assay of PEI-GQDs loaded with RNP, and ssODN repair template. Different molar ratios of RNP and ssODN repair template (1:0.14, 1:0.16, 1:0.2, 1:0.25, 1:0.3, 1:0.5, and 1:1) have been tested.

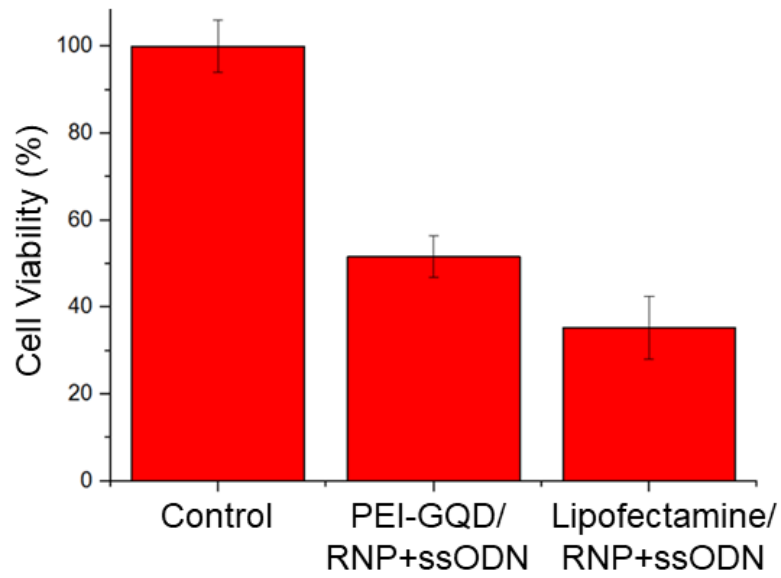

**Figure S7.** Analysis of PC-3 cancer cell death after the treatment with PEI-GQD/RNP+ssODN and Lipofectamine/RNP+ssODN. Percent cell viability of PC-3 cells assessed via stained dead cell count (mean  $\pm$  SE, n = 4).



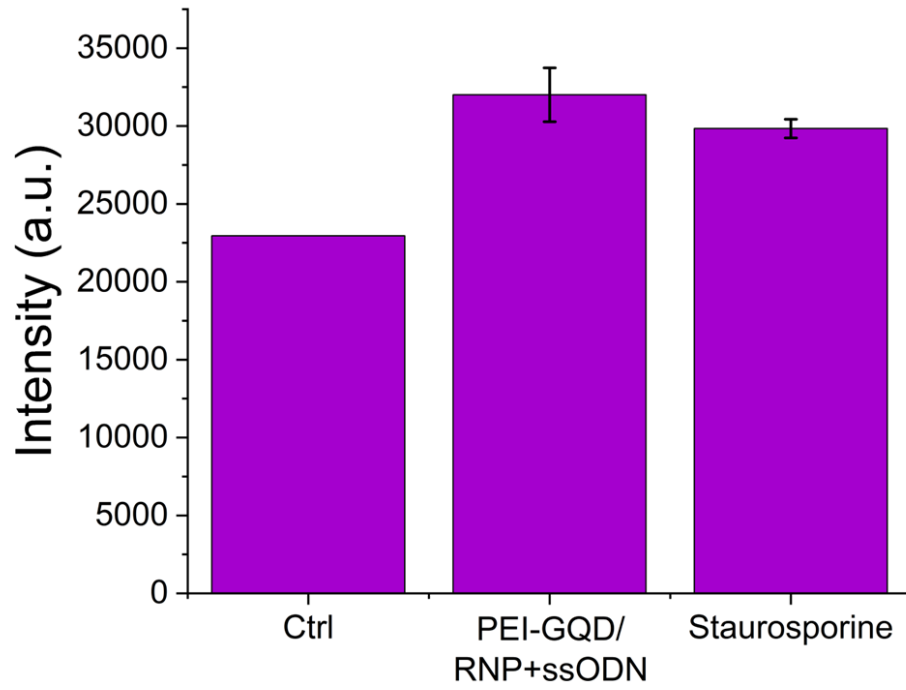

**Figure S8.** Level of caspase activity based on luminescence intensity using the Caspase-3/7 assay (mean  $\pm$  SE, n = 2).
